# Supplementary material for: Handgrip Strength and Muscle Quality: Results from the National Health and Nutrition Examination Survey Database
Source: MDPI journal article supplement (doi:10.3390/jcm12093184), 2023-04-28
Supplement: s1 [file s1]

**Table S1.** Comparison of handgrip strength between dominant and nondominant hands.

|        | Dominant hand | Non-dominant hand | P value |
|--------|---------------|-------------------|---------|
| Male   | 40.85 ± 0.20  | 40.37 ± 0.39      | 0.4103  |
| Female | 26.84 ± 0.14  | 26.52 ± 0.27      | 0.3267  |

**Table S2.** Population-weighted Anthropometry and demographics and behavioral characteristics of the individuals who performed the ALMI.

|                                     | ALMI           |                  |
|-------------------------------------|----------------|------------------|
|                                     | Male           | Female           |
| Anthropometry and demographics      |                |                  |
| Age (year)                          | 32.9 ± 0.4     | 33.2 ± 0.5*      |
| Race/Hispanic origin (%)            |                |                  |
| Mexican American                    | 11.8           | 10.5*            |
| Other Hispanic                      | 6.6            | 6.9              |
| Non-Hispanic White                  | 61.4           | 61.2             |
| Non-Hispanic Black                  | 11.6           | 12.9             |
| Other Race - Including Multi-Racial | 8.6            | 8.5              |
| Weight (kg)                         | 81.0 ± 0.5     | 71.1 ± 0.6 *     |
| Smoking (%)                         |                |                  |
| Never                               | 48.3           | 52.7             |
| Yes                                 | 45.0           | 43.6             |
| Ever                                | 6.7            | 3.7              |
| Drinking (%)                        |                |                  |
| yes                                 | 47.4           | 41.1             |
| no                                  | 52.6           | 58.9             |
| Waist circumference (cm)            | 94.1 ± 0.4     | 90.8 ± 0.5 *     |
| Height (cm)                         | 172.1 ± 0.3    | 160.8 ± 0.2 *    |
| BMI (kg/m <sup>2</sup> )            | 26.9 ± 0.2     | 27.2 ± 0.2 *     |
| Physical activity (Mets score)      | 4670.6 ± 188.8 | 2594.8 ± 256.0 * |
| Vitamin D(nmol/L)                   | 63.6 ± 1.1     | 67.9 ± 1.4 *     |
| Albumin(g/l)                        | 44.7 ± 0.1     | 42.6 ± 0.1 *     |
| Energy (kcal)                       | 2566.4 ± 19.9  | 1895.6 ± 14.9 *  |

\*  $p < 0.05$ .**Table S3.** Threshold effect analyses of association between age and HGS for women.

| HGS                                 | β (95%CI)                    | Detail-P                     |
|-------------------------------------|------------------------------|------------------------------|
| Mexican American                    |                              |                              |
| <18                                 | 1.74 (1.65, 1.83) <0.0001    |                              |
| >18                                 | -0.15 (-0.17, -0.13) <0.0001 | -1.89 (-1.99, -1.79) <0.0001 |
| Other Hispanic                      |                              |                              |
| <18                                 | 1.63 (1.50, 1.76) <0.0001    |                              |
| >18                                 | -0.14 (-0.16, -0.11) <0.0001 | -1.77 (-1.91, -1.63) <0.0001 |
| Non-Hispanic White                  |                              |                              |
| <18                                 | 1.96 (1.88, 2.05) <0.0001    |                              |
| >18                                 | -0.16 (-0.17, -0.15) <0.0001 | -1.98 (-2.08, -1.89) <0.0001 |
| Non-Hispanic Black                  |                              |                              |
| <18                                 | 1.84 (1.74, 1.94) <0.0001    |                              |
| >18                                 | -0.14 (-0.15, -0.12) <0.0001 | -1.97 (-2.08, -1.86) <0.0001 |
| Other Race - Including Multi-Racial |                              |                              |
| <18                                 | 1.66 (1.55, 1.77) <0.0001    |                              |
| >18                                 | -0.12 (-0.14, -0.11) <0.0001 | -1.78 (-1.90, -1.66) <0.0001 |
| Total                               |                              |                              |
| <18                                 | 1.86 (1.81, 1.91) <0.0001    |                              |
| >18                                 | -0.15 (-0.16, -0.15) <0.0001 | -2.01 (-2.06, -1.96) <0.0001 |

**Table S4.** Threshold effect analyses of association between age and ALMI for women.

| ALMI                                | $\beta$ (95%CI)        | Detail-P                 |
|-------------------------------------|------------------------|--------------------------|
| Mexican American                    |                        |                          |
| <19                                 | 0.2 (0.1, 0.2) <0.001  |                          |
| >19                                 | 0.0 (-0.0, 0.0) 0.175  | -0.2 (-0.2, -0.1) <0.001 |
| Other Hispanic                      |                        |                          |
| <19                                 | 0.1 (0.1, 0.2) <0.001  |                          |
| >19                                 | 0.0 (-0.0, 0.0) 0.624  | -0.1 (-0.2, -0.1) <0.001 |
| Non-Hispanic White                  |                        |                          |
| <19                                 | 0.2 (0.1, 0.2) <0.001  |                          |
| >19                                 | -0.0 (-0.0, 0.0) 0.928 | -0.2 (-0.2, -0.1) <0.001 |
| Non-Hispanic Black                  |                        |                          |
| <19                                 | 0.2 (0.2, 0.2) <0.001  |                          |
| >19                                 | 0.0 (-0.0, 0.0) 0.842  | -0.2 (-0.2, -0.2) <0.001 |
| Other Race - Including Multi-Racial |                        |                          |
| <19                                 | 0.1 (0.1, 0.1) <0.001  |                          |
| >19                                 | 0.0 (-0.0, 0.0) 0.871  | -0.1 (-0.1, -0.1) <0.001 |
| Total                               |                        |                          |
| <19                                 | 0.2 (0.2, 0.2) <0.001  |                          |
| >19                                 | 0.0 (-0.0, 0.0) 0.516  | -0.2 (-0.2, -0.1) <0.001 |

**Table S5.** Threshold effect analyses of association between age and HGS for men.

| HGS Men                             | $\beta$ (95%CI)          | Detail-P                 |
|-------------------------------------|--------------------------|--------------------------|
| Mexican American                    |                          |                          |
| <72                                 | -0.3 (-0.4, -0.3) <0.001 |                          |
| >72                                 | -1.0 (-1.5, -0.5) <0.001 | -0.7 (-1.2, -0.1) 0.017  |
| Other Hispanic                      |                          |                          |
| <72                                 | -0.3 (-0.4, -0.3) <0.001 |                          |
| >72                                 | -0.8 (-1.4, -0.3) 0.004  | -0.5 (-1.1, 0.1) 0.088   |
| Non-Hispanic White                  |                          |                          |
| <72                                 | -0.3 (-0.3, -0.2) <0.001 |                          |
| >72                                 | -1.0 (-1.2, -0.8) <0.001 | -0.7 (-0.9, -0.6) <0.001 |
| Non-Hispanic Black                  |                          |                          |
| <72                                 | -0.3 (-0.4, -0.3) <0.001 |                          |
| >72                                 | -1.0 (-1.3, -0.6) <0.001 | -0.7 (-1.0, -0.3) <0.001 |
| Other Race - Including Multi-Racial |                          |                          |
| <72                                 | -0.3 (-0.3, -0.2) <0.001 |                          |
| >72                                 | -0.9 (-1.3, -0.5) <0.001 | -0.6 (-1.1, -0.2) 0.005  |
| Total                               |                          |                          |
| <72                                 | -0.3 (-0.3, -0.3) <0.001 |                          |
| >72                                 | -1.0 (-1.1, -0.8) <0.001 | -0.7 (-0.8, -0.5) <0.001 |

**Table S6.** Threshold effect analyses of association between age and HGS for women.

| HGS Women          | $\beta$ (95%CI)          | Detail-P                 |
|--------------------|--------------------------|--------------------------|
| Mexican American   |                          |                          |
| <66                | -0.2 (-0.2, -0.1) <0.001 |                          |
| >66                | -0.4 (-0.6, -0.2) <0.001 | -0.2 (-0.4, 0.0) 0.084   |
| Other Hispanic     |                          |                          |
| <66                | -0.2 (-0.2, -0.1) <0.001 |                          |
| >66                | -0.5 (-0.6, -0.3) <0.001 | -0.3 (-0.5, -0.1) <0.001 |
| Non-Hispanic White |                          |                          |
| <66                | -0.2 (-0.2, -0.1) <0.001 |                          |
| >66                | -0.5 (-0.5, -0.4) <0.001 | -0.3 (-0.4, -0.2) <0.001 |
| Non-Hispanic Black |                          |                          |

|                                     |                          |                          |
|-------------------------------------|--------------------------|--------------------------|
| <66                                 | -0.2 (-0.2, -0.1) <0.001 |                          |
| >66                                 | -0.5 (-0.5, -0.4) <0.001 | -0.3 (-0.4, -0.2) <0.001 |
| Other Race - Including Multi-Racial |                          |                          |
| <66                                 | -0.1 (-0.2, -0.1) <0.001 |                          |
| >66                                 | -0.4 (-0.6, -0.3) <0.001 | -0.3 (-0.5, -0.1) <0.001 |
| Total                               |                          |                          |
| <66                                 | -0.2 (-0.2, -0.2) <0.001 |                          |
| >66                                 | -0.5 (-0.5, -0.4) <0.001 | -0.3 (-0.4, -0.3) <0.001 |
